# Supplementary material for: Rediscovery of Tetronomycin as a Broad-Spectrum and Potent Antibiotic against Drug-Resistant Gram-Positive Bacteria
Source: PubMed Central journal article supplement — ACS Omega. 2023 Mar 14;8(12):11556–63. doi: 10.1021/acsomega.3c00651 (PMC10061530; doi:10.1021/acsomega.3c00651), 2023-03-14
Supplement: ao3c00651_si_001.pdf [file ao3c00651_si_001.pdf]

## Supporting information

# Rediscovery of tetronomycin as a broad-spectrum and potent antibiotic against drug-resistant gram-positive bacteria

Aoi Kimishima<sup>1,2‡</sup>, Iori Tsuruoka<sup>1‡</sup>, Hiroki Kanto<sup>1</sup>, Hayama Tsutsumi<sup>1,2</sup>, Naoaki Arima<sup>3</sup>, Kazunari Sakai<sup>3</sup>, Miho Sugamata<sup>1,2</sup>, Hidehito Matsui<sup>1,2</sup>, Yoshihiro Watanabe<sup>1,2</sup>, Masato Iwatsuki<sup>1,2</sup>, Masako Honsho<sup>1,2</sup>, Kamrun Naher<sup>2</sup>, Yuki Inahashi<sup>1,2</sup>, Hideaki Hanaki<sup>1,2,3</sup>, Yukihiro Asami<sup>1,2\*</sup>

<sup>1</sup> Graduate School of Infection Control Sciences, Kitasato University, 5-9-1 Shirokane, Minato-ku, Tokyo 108-8641, Japan.

<sup>2</sup> Ōmura Satoshi Memorial Institute, Kitasato University, 5-9-1 Shirokane, Minato-ku, Tokyo, 108-8641, Japan.

<sup>3</sup> Tokyo New Drug Research Laboratories, Pharmaceutical Business Unit, Kowa Company, Ltd., 2-17-43 Noguchicho, Higashimurayama, Tokyo, 189-0022, Japan

‡These authors contributed equally to this work.



## Table of Contents

|                                                                                                      |           |
|------------------------------------------------------------------------------------------------------|-----------|
| <b>Figure S1.</b> $^1\text{H}$ NMR spectrum of <b>2</b> .....                                        | <b>3</b>  |
| <b>Figure S2.</b> $^{13}\text{C}$ NMR spectrum of <b>2</b> .....                                     | <b>4</b>  |
| <b>Figure S3.</b> HSQC spectrum of <b>2</b> .....                                                    | <b>5</b>  |
| <b>Figure S4.</b> COSY spectrum of <b>2</b> .....                                                    | <b>6</b>  |
| <b>Figure S5.</b> HMBC spectrum of <b>2</b> .....                                                    | <b>7</b>  |
| <b>Figure S6.</b> Decoupling experiments of <b>2</b> .....                                           | <b>8</b>  |
| <b>Figure S7.</b> COSY, decoupling, and HMBC analyses of tetronomycin sodium salt ( <b>2</b> ) ..... | <b>9</b>  |
| <b>Figure S8.</b> $^1\text{H}$ NMR spectrum of <b>3</b> .....                                        | <b>10</b> |
| <b>Figure S9.</b> $^{13}\text{C}$ NMR spectrum of <b>3</b> .....                                     | <b>11</b> |
| <b>Figure S10.</b> $^1\text{H}$ NMR spectrum of <b>4</b> .....                                       | <b>12</b> |
| <b>Figure S11.</b> $^{13}\text{C}$ NMR spectrum of <b>4</b> .....                                    | <b>13</b> |
| <b>Figure S12.</b> $^1\text{H}$ NMR spectrum of <b>5</b> .....                                       | <b>14</b> |
| <b>Figure S13.</b> $^{13}\text{C}$ NMR spectrum of <b>5</b> .....                                    | <b>15</b> |
| <b>Figure S14.</b> $^1\text{H}$ NMR spectrum of <b>6</b> .....                                       | <b>16</b> |
| <b>Figure S15.</b> $^{13}\text{C}$ NMR spectrum of <b>6</b> .....                                    | <b>17</b> |
| <b>Figure S16.</b> $^1\text{H}$ NMR spectrum of <b>7</b> .....                                       | <b>18</b> |

|                                                                                                                                                                     |           |
|---------------------------------------------------------------------------------------------------------------------------------------------------------------------|-----------|
| <b>Figure S17.</b> $^{13}\text{C}$ NMR spectrum of <b>7</b> .....                                                                                                   | <b>19</b> |
| <b>Figure S18.</b> Comparison of biosynthetic gene clusters of tetronomycin<br>between <i>Streptomyces</i> sp. K20-0247 and <i>Streptomyces</i> sp. NRRL 11266..... | <b>19</b> |
| <b>Table S1.</b> Annotation of biosynthetic gene cluster of tetronomycin in<br><i>Streptomyces</i> sp. K20-0247 .....                                               | <b>20</b> |
| <b>Figure S19.</b> Determination of $\text{Ca}^{2+}$ ionophobic activity of <b>1</b> and <b>4</b> .....                                                             | <b>21</b> |
| <b>Table S2.</b> Results of activity evaluation of tetronomycin and its derivatives.....                                                                            | <b>22</b> |
| <b>Table S3.</b> Information of strains used in this study.....                                                                                                     |           |

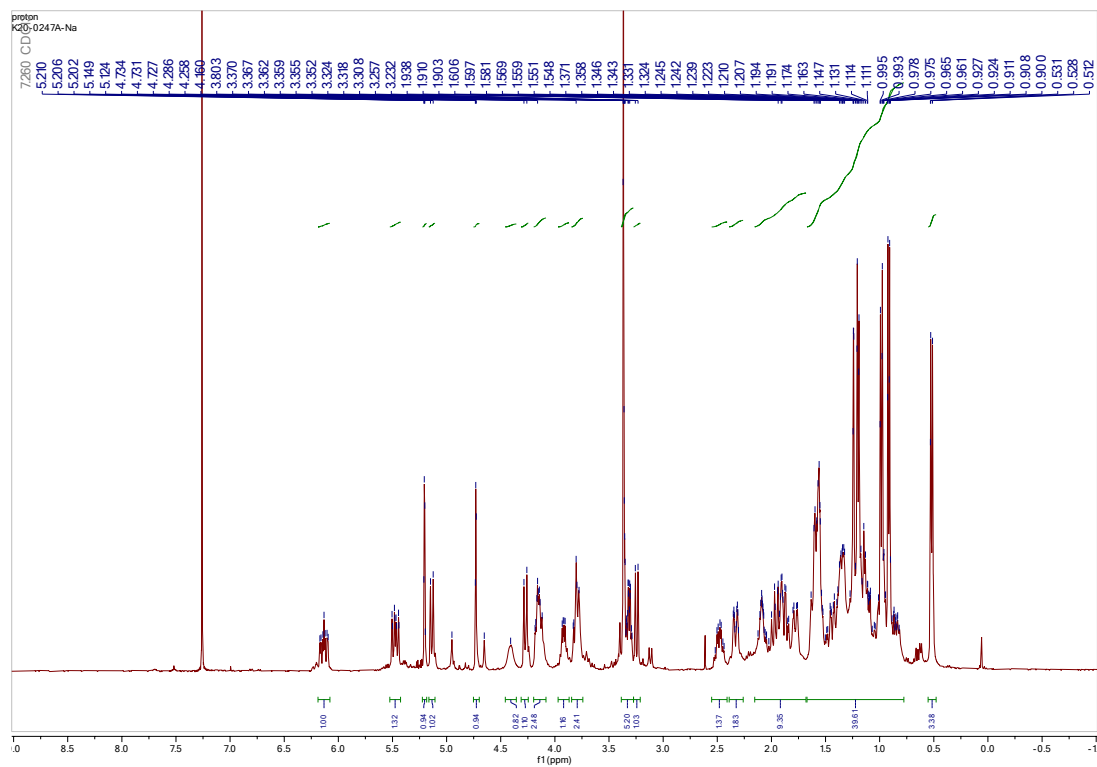

Figure S1. <sup>1</sup>H NMR (CDCl<sub>3</sub>, 400 MHz) spectrum of tetronomycin sodium salt (2).

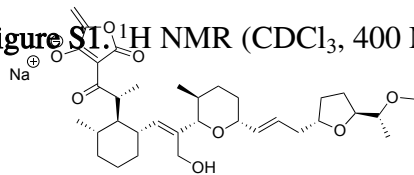

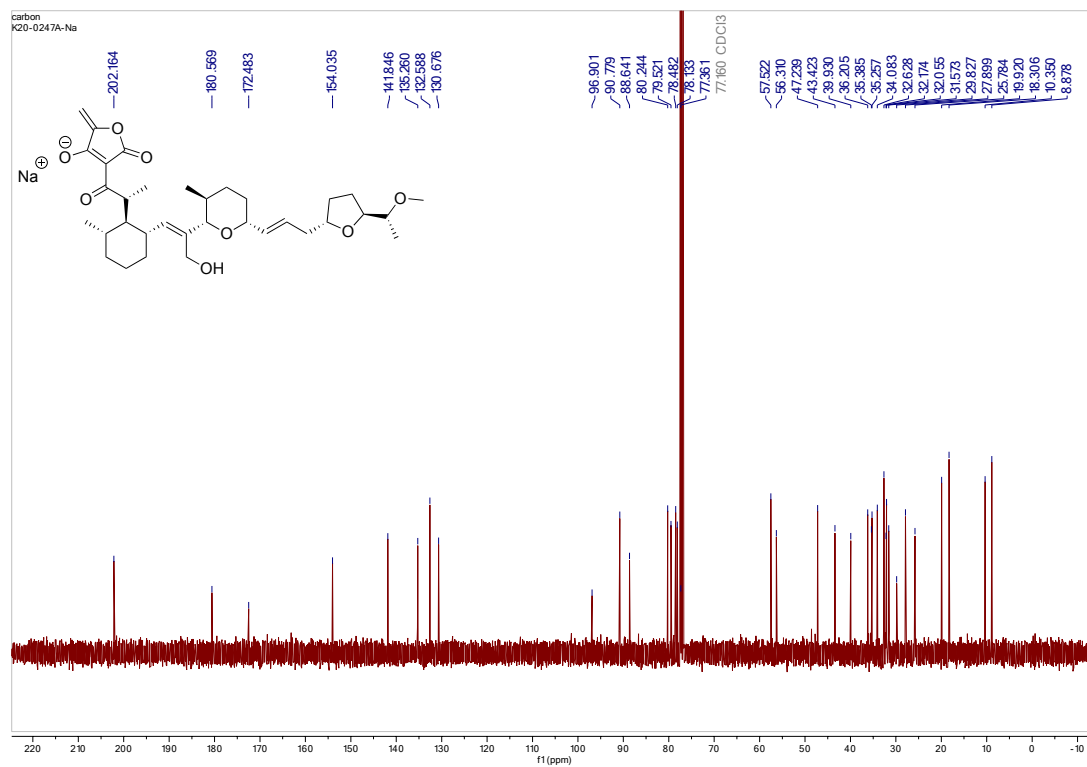

**Figure S2.** <sup>13</sup>C NMR (CDCl<sub>3</sub>, 100 MHz) spectrum of tetronomycin sodium salt (2).

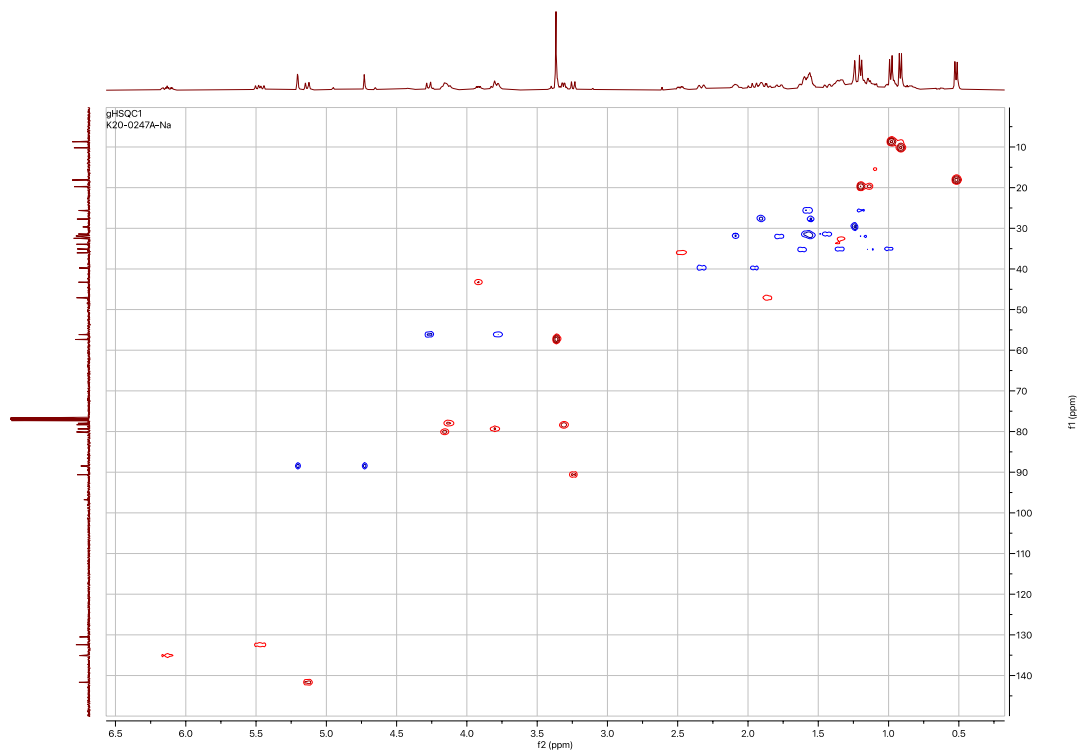

**Figure S3.** HSQC (CDCl<sub>3</sub>, 400 MHz) spectrum of tetronomycin sodium salt (**2**).

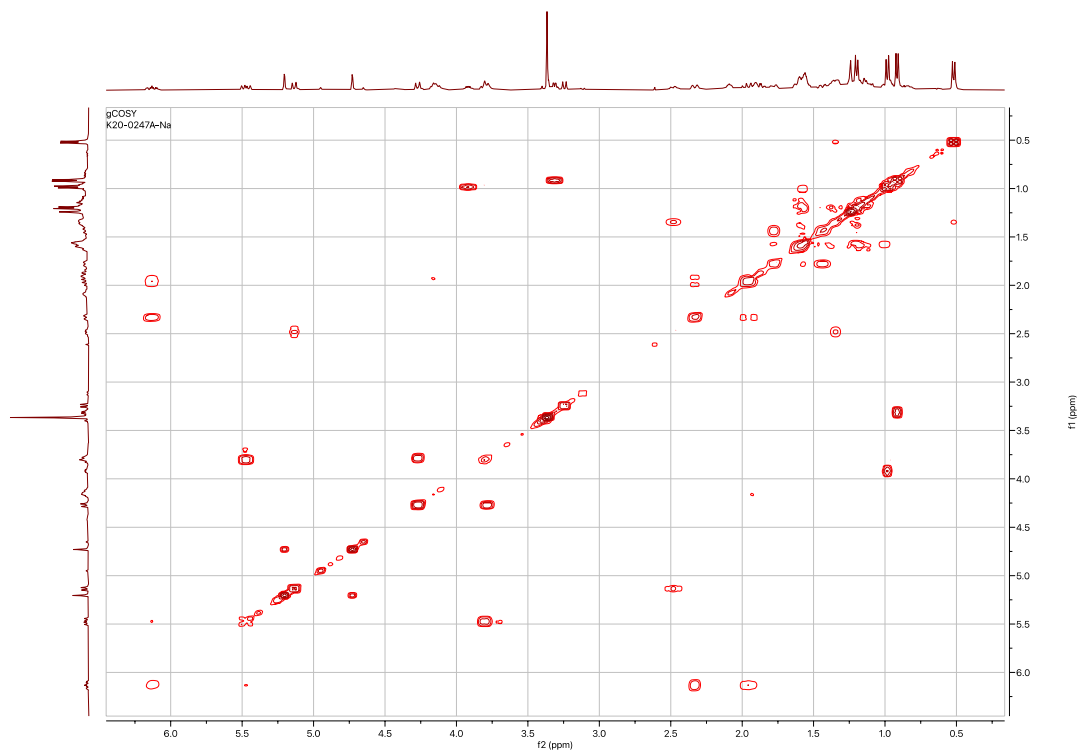

**Figure S4.** COSY ( $\text{CDCl}_3$ , 400 MHz) spectrum of tetronomycin sodium salt (**2**).



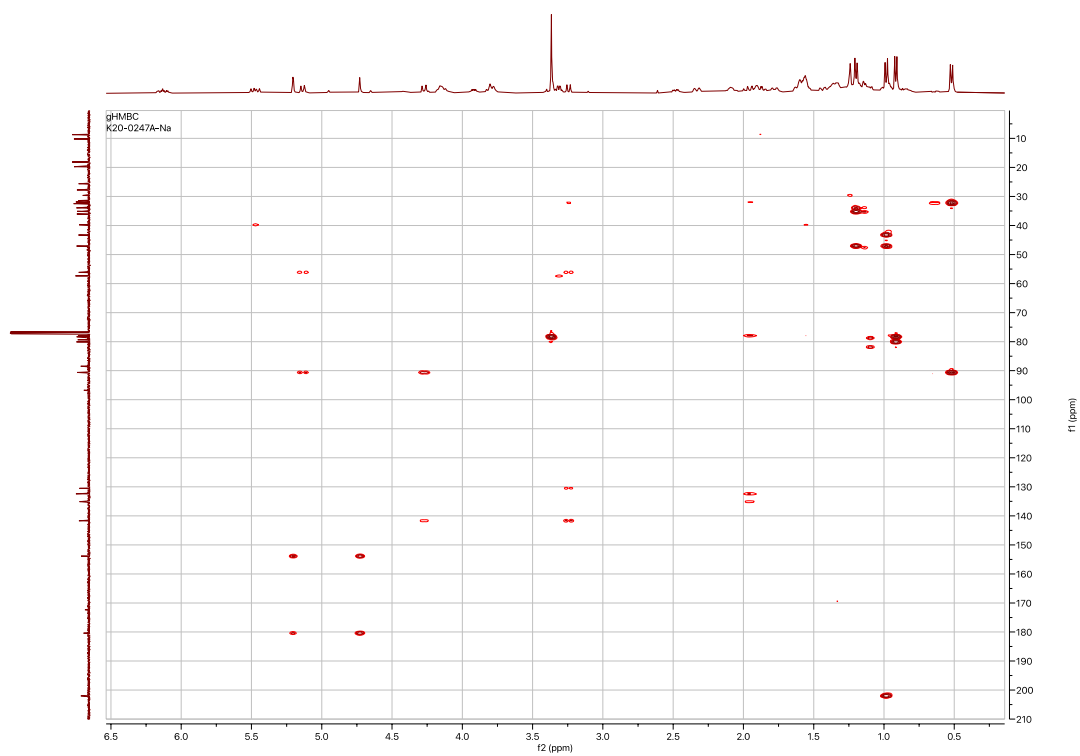

Figure S5. HMBC (CDCl<sub>3</sub>, 400 MHz) spectrum of tetronomycin sodium salt (2).

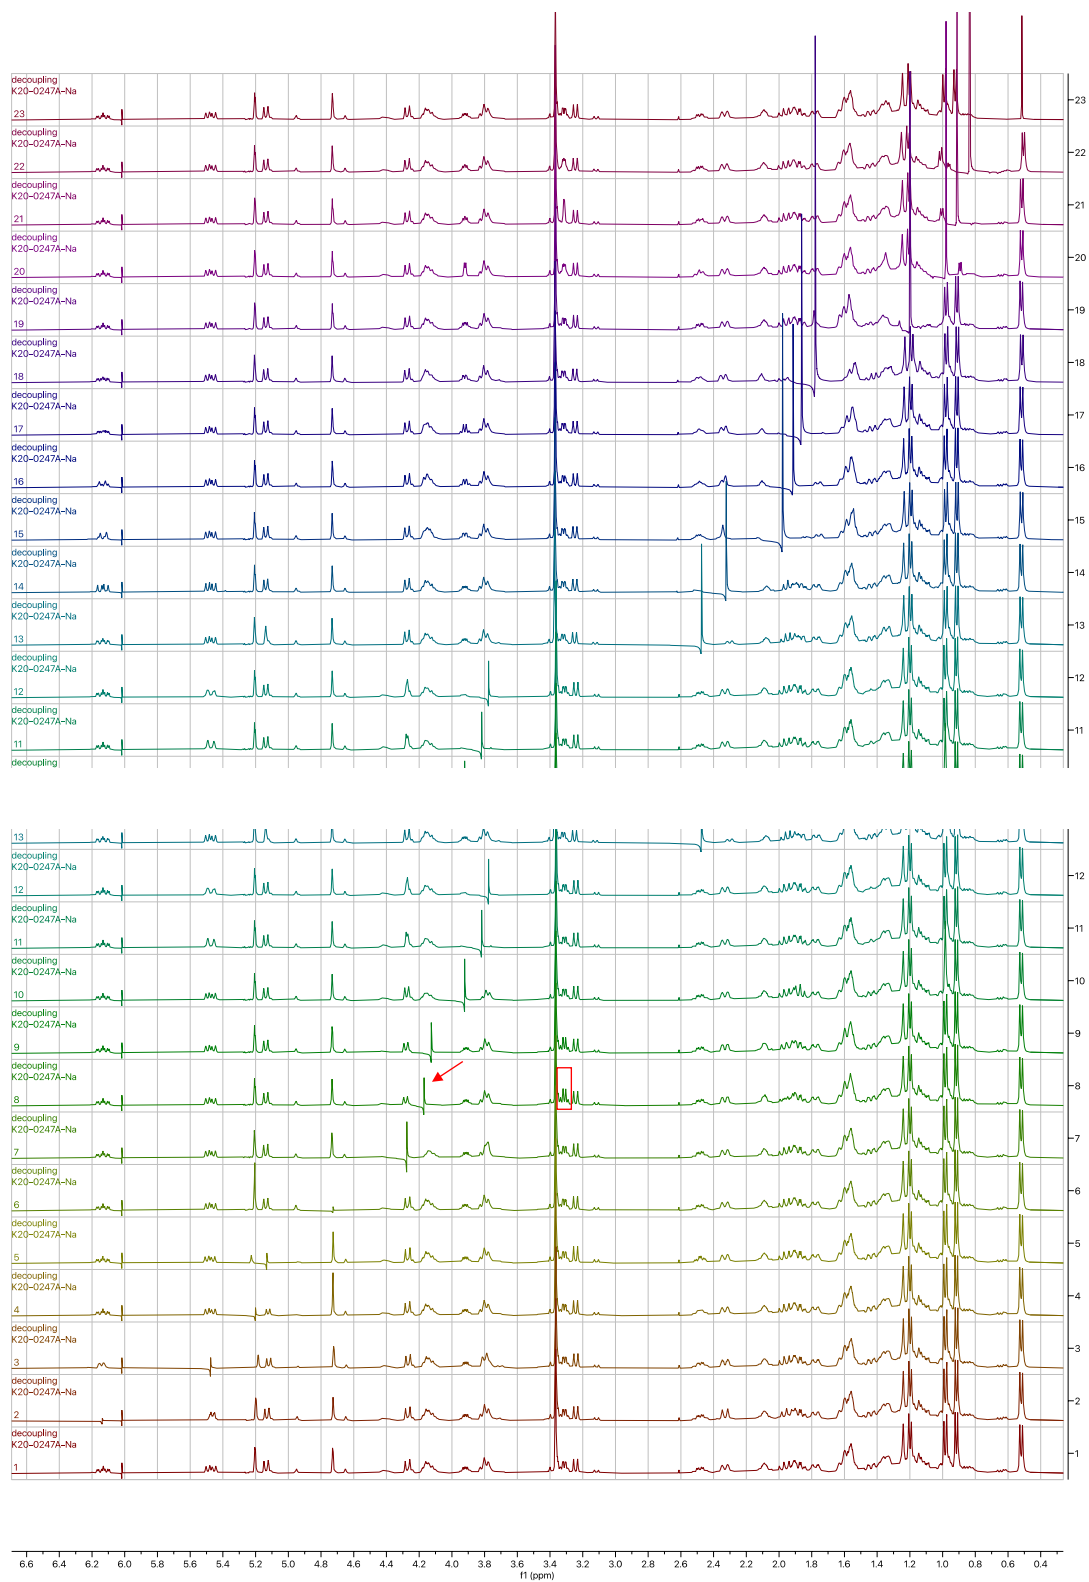

Figure S6. Decoupling experiments of tetromycin sodium salt (2).

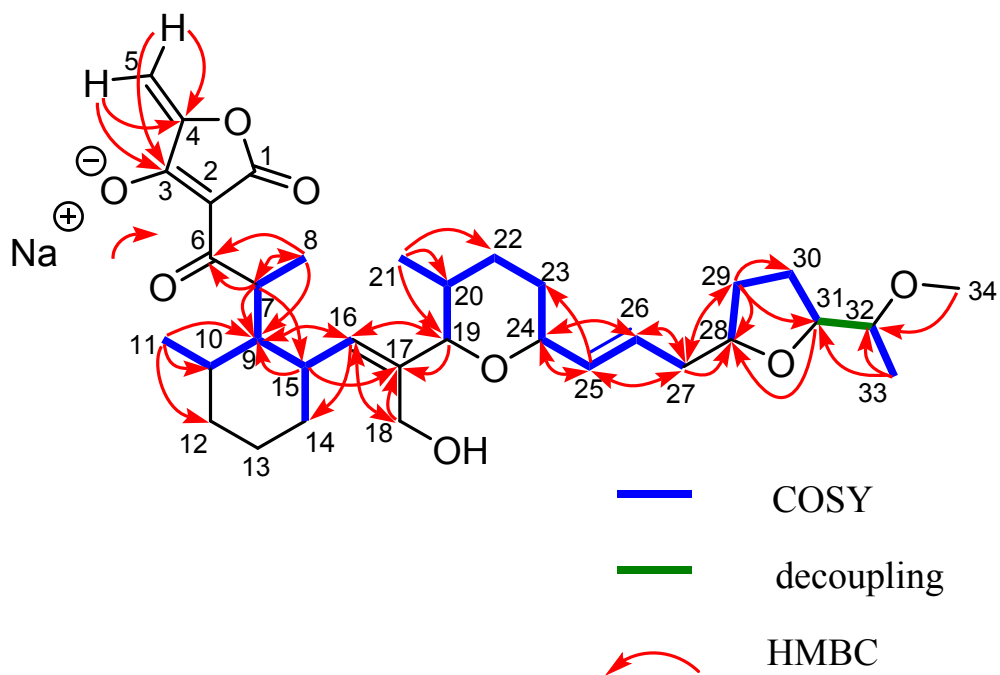

**Figure S7.** COSY, decoupling, and HMBC analyses of tetronomycin sodium salt (2).

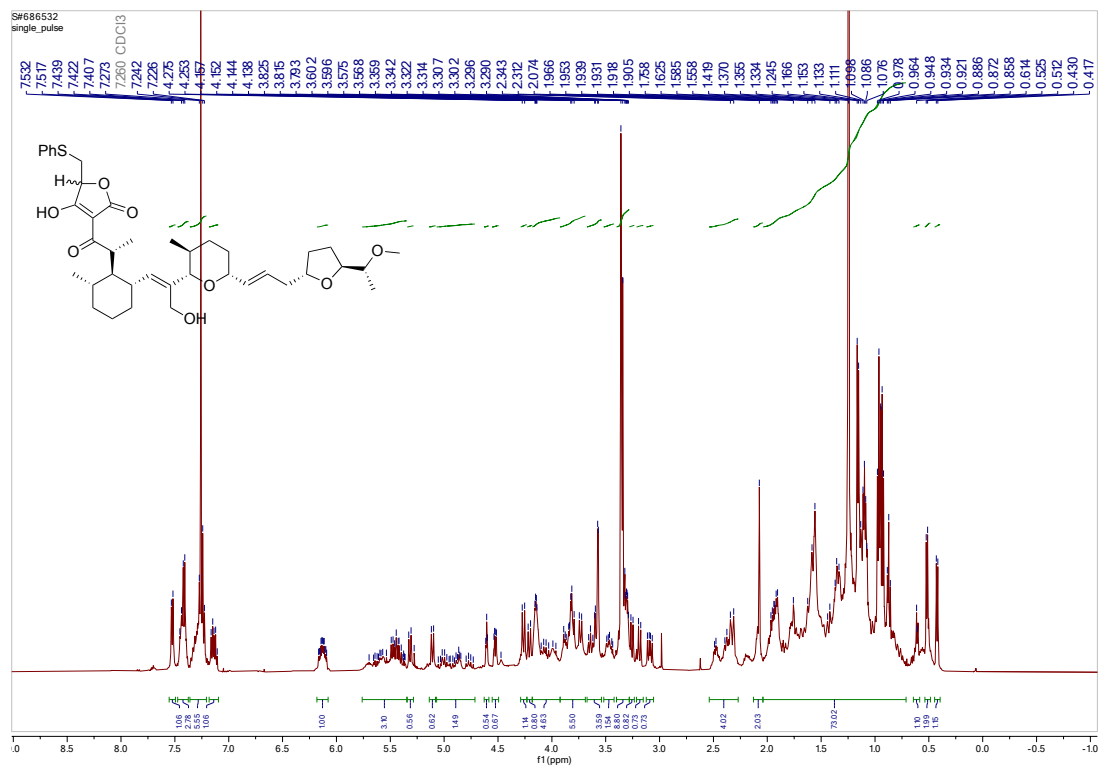

Figure S8. <sup>1</sup>H NMR (CDCl<sub>3</sub>, 500 MHz) spectrum of tetronomycin thioacetal derivative

(3).

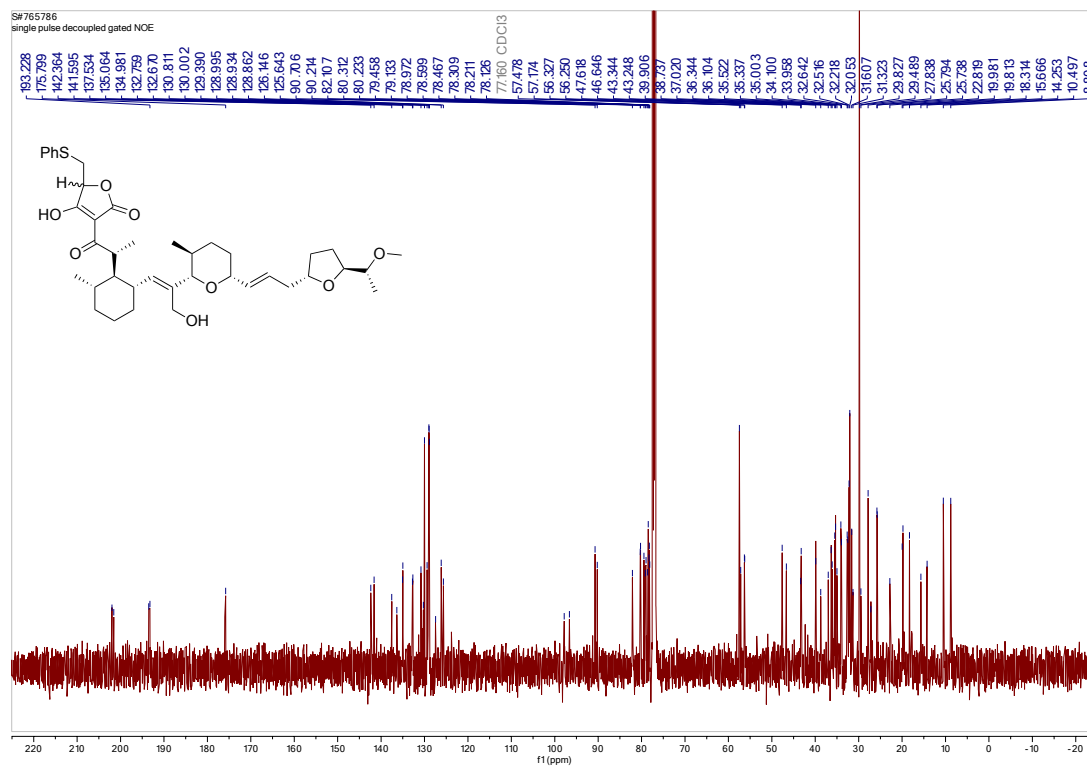

Figure S9.  $^{13}\text{C}$  NMR ( $\text{CDCl}_3$ , 125 MHz) spectrum of tetronomycin thioacetal derivative

(3).

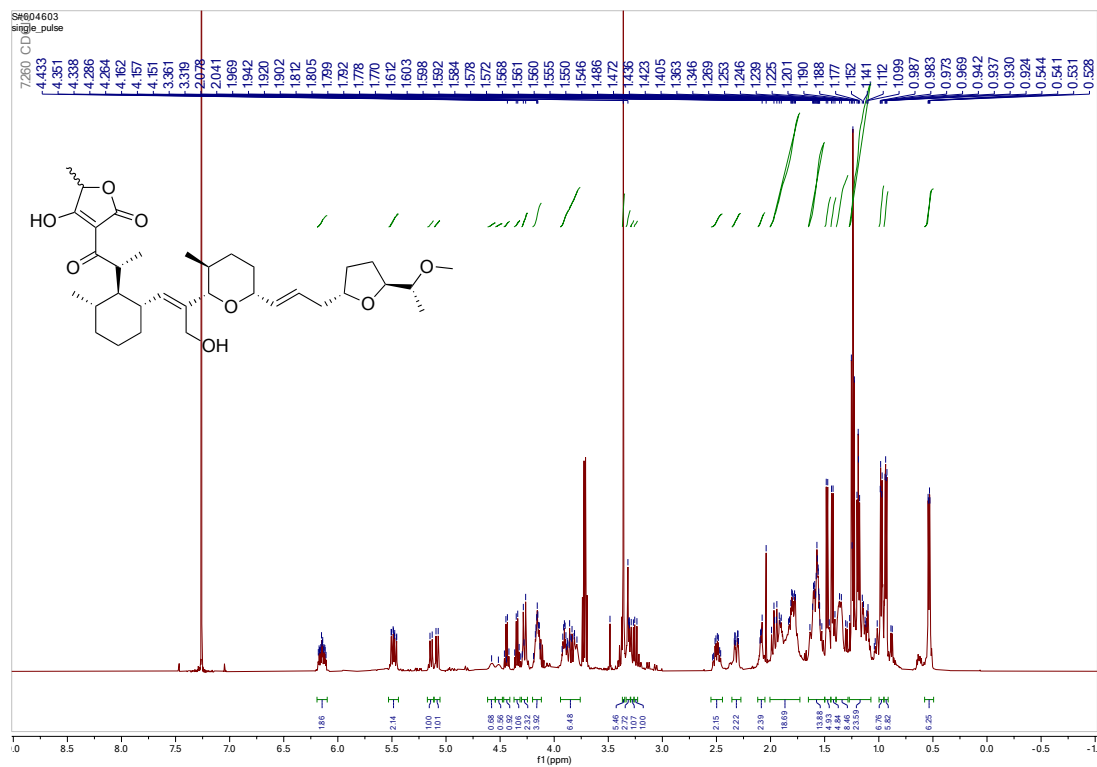

Figure S10. <sup>1</sup>H NMR (CDCl<sub>3</sub>, 500 MHz) spectrum of reduced tetronomycin (4).

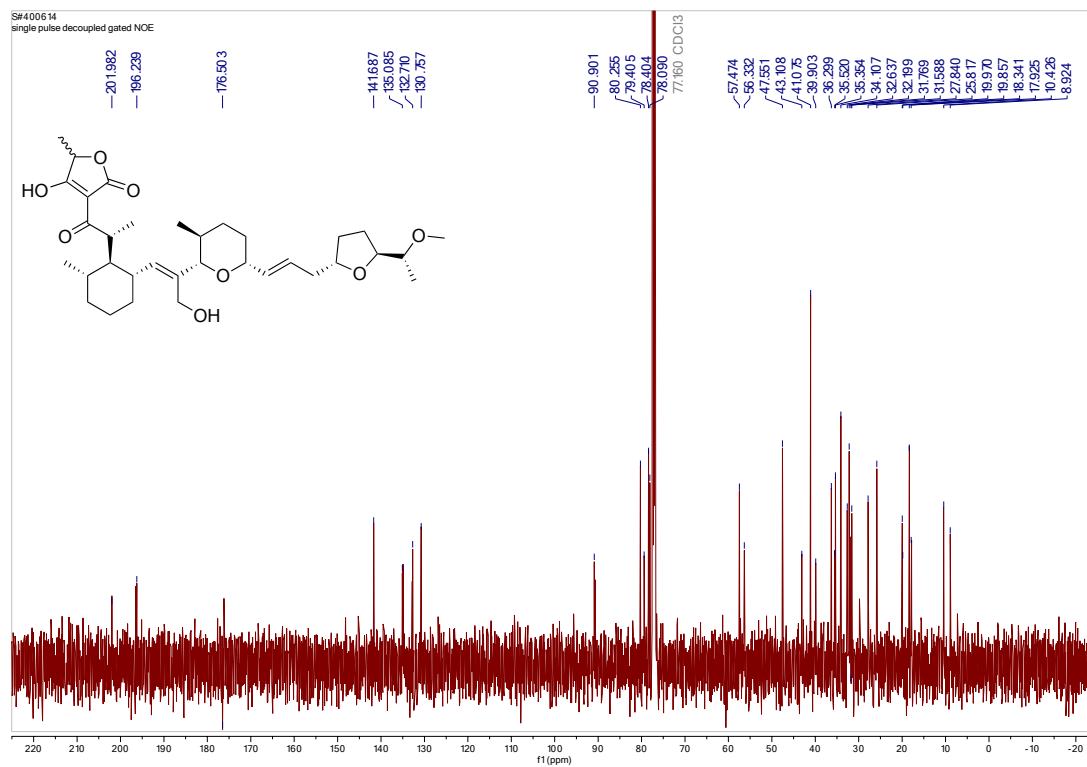

**Figure S11.** <sup>13</sup>C NMR (CDCl<sub>3</sub>, 125 MHz) spectrum of reduced tetromycin (**4**).

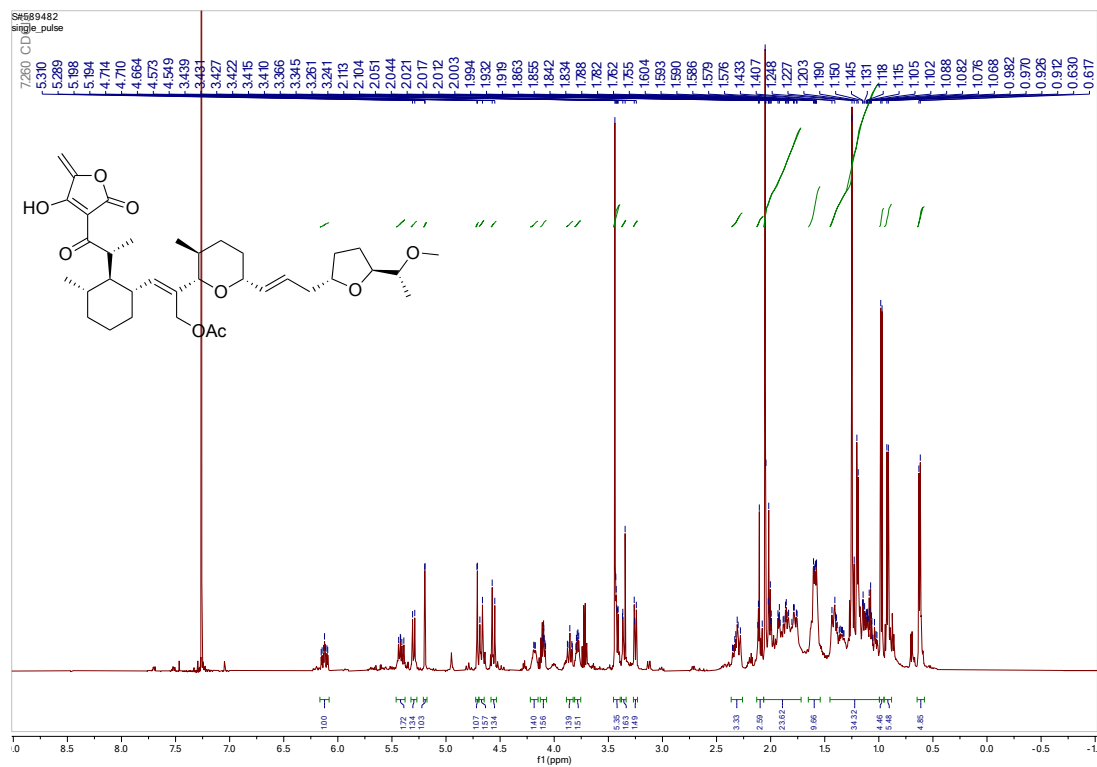

Figure S12.  $^1\text{H}$  NMR ( $\text{CDCl}_3$ , 500 MHz) spectrum of acetyl tetronomycin (5).



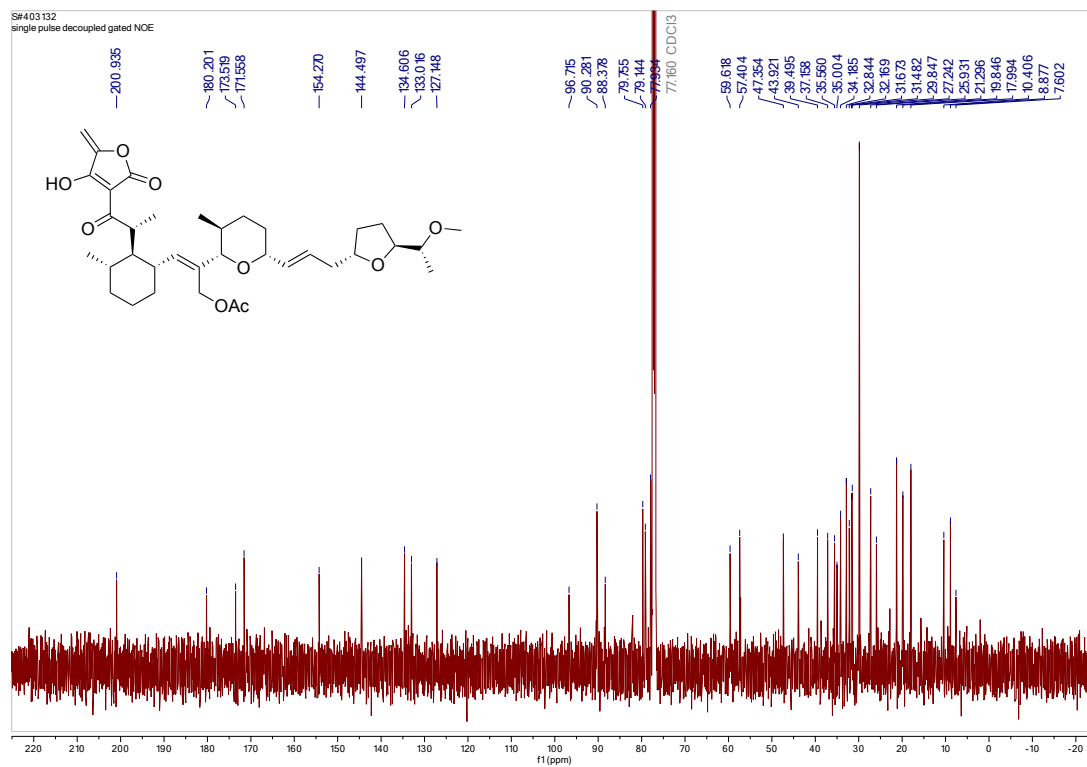

**Figure S13.**  $^{13}\text{C}$  NMR ( $\text{CDCl}_3$ , 125 MHz) spectrum of acetyl tetromycin (**5**).

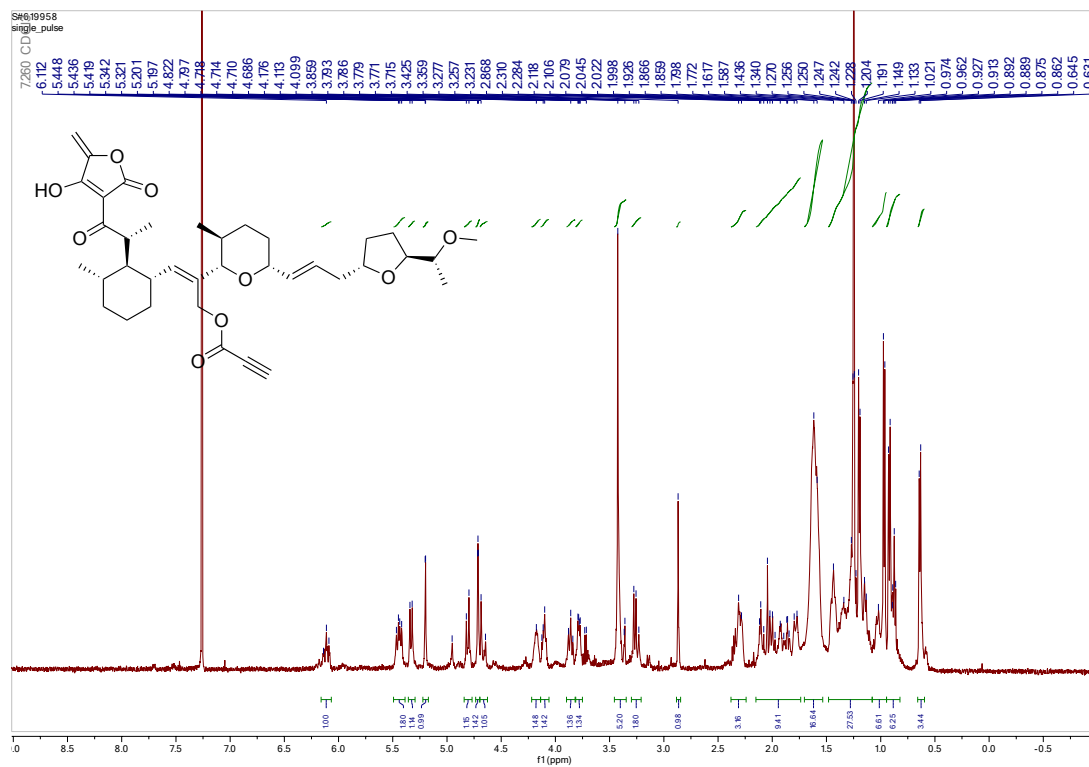

Figure S14. <sup>1</sup>H NMR (CDCl<sub>3</sub>, 500 MHz) spectrum of propynoic tetronomycin (6).

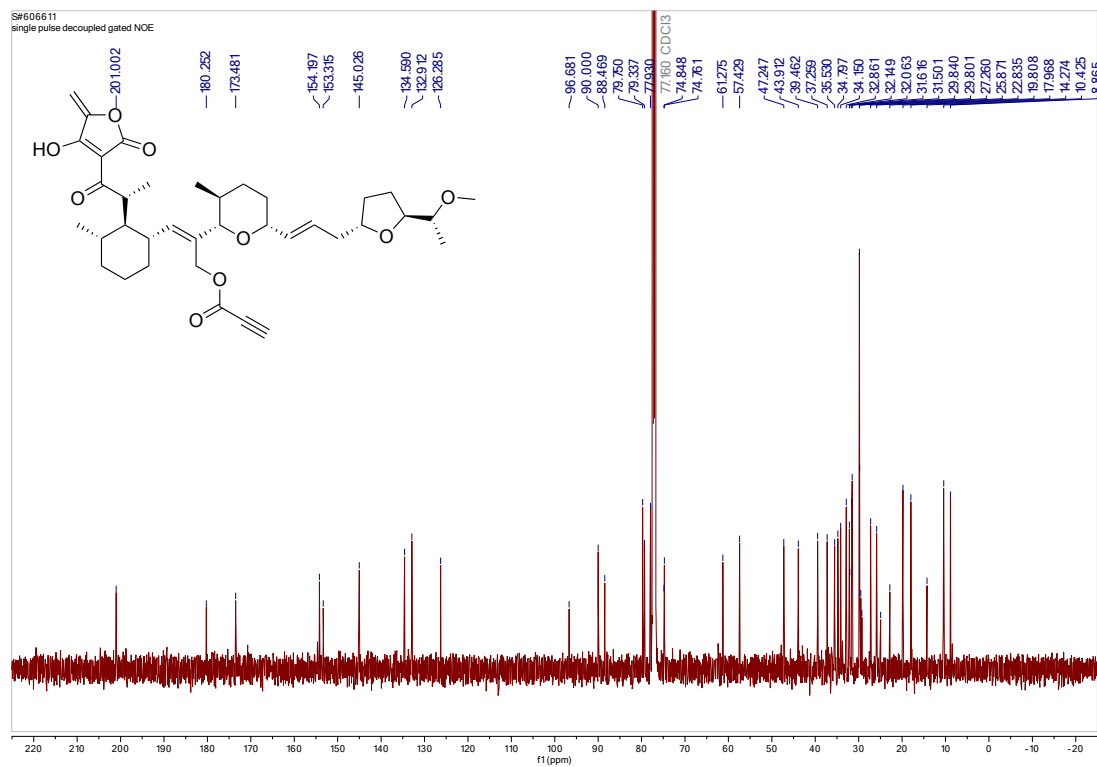

Figure S15.  $^{13}\text{C}$  NMR ( $\text{CDCl}_3$ , 125 MHz) spectrum of propynoic tetronomicin (6).

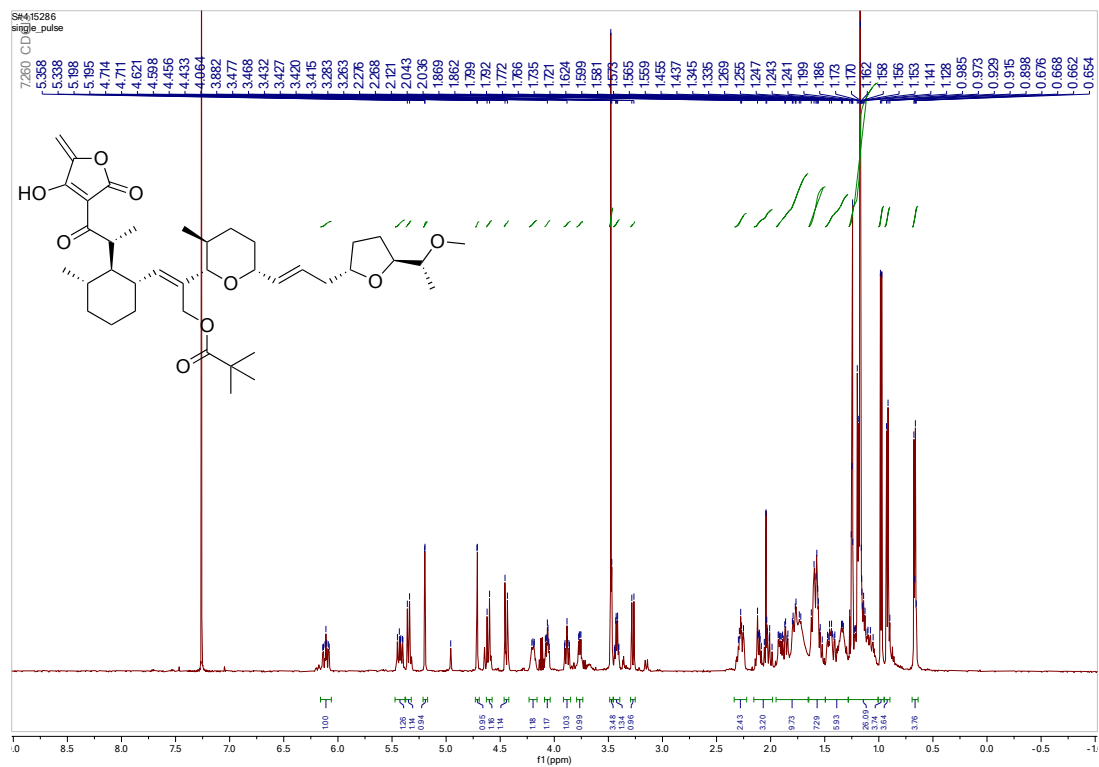

Figure S16. <sup>1</sup>H NMR (CDCl<sub>3</sub>, 500 MHz) spectrum of pivaloyl tetronomycin (7).

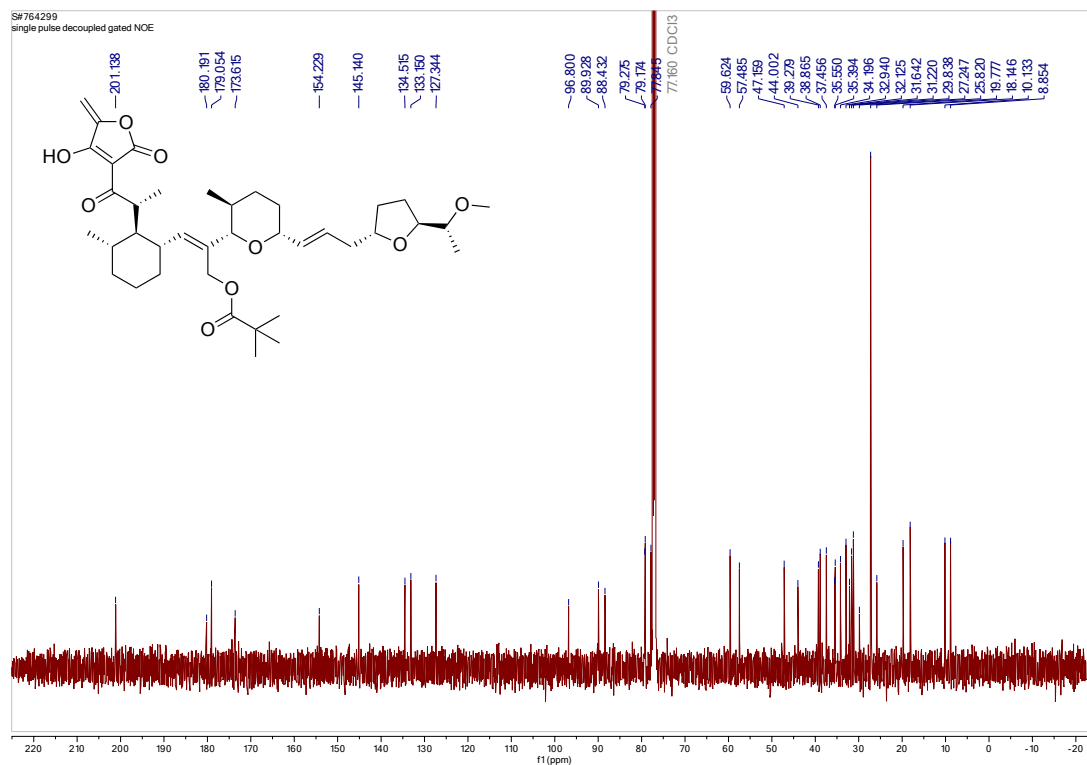

**Figure S17.**  $^{13}\text{C}$  NMR ( $\text{CDCl}_3$ , 125 MHz) spectrum of pivaloyl tetronomycin (7).

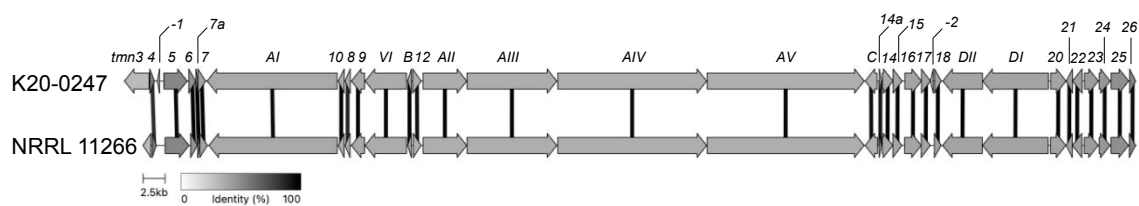

**Figure S18.** Comparison of biosynthetic gene clusters of tetronomycin between *Streptomyces* sp. K20-0247 and *Streptomyces* sp. NRRL 11266

Similar genes are connected by the line and line color indicates the identity between translation products

**Table S1.** Annotation of biosynthetic gene cluster of tetronomycin in *Streptomyces* sp.

K20-0247 (The GenBank accession number: OP903461)

| gene           | annotation                                    | Amino acids | identity (%) |
|----------------|-----------------------------------------------|-------------|--------------|
| <i>tmn3</i>    | LuxR family transcriptional regulator         | 935         | 99.3*        |
| <i>tmn4</i>    | PLP-dependent oxidase                         | 180         | 100          |
| <i>tmn-1</i>   | hypothetical protein                          | 82          | 98.8**       |
| <i>tmn5</i>    | LuxR family transcriptional regulator         | 887         | 99.7         |
| <i>tmn6</i>    | a/b hydrolase                                 | 263         | 99.2         |
| <i>tmn7a</i>   | acyl carrier protein                          | 75          | 100          |
| <i>tmn7</i>    | 2-oxo acid dehydrogenase subunit E2           | 292         | 99.3         |
| <i>tmnAI</i>   | type I polyketide synthase                    | 4943        | 97.7         |
| <i>tmn10</i>   | DedA family membrane protein                  | 223         | 100          |
| <i>tmn8</i>    | putative ribosomal protein L15P               | 196         | 100          |
| <i>tmn9</i>    | FAD-dependent monooxygenase                   | 500         | 97.6         |
| <i>tmnVI</i>   | type I polyketide synthase                    | 1574        | 97.5         |
| <i>tmnB</i>    | NTF2 family protein                           | 141         | 99.3         |
| <i>tmn12</i>   | methyltransferase                             | 300         | 100          |
| <i>tmnAII</i>  | type I polyketide synthase                    | 1658        | 98.8         |
| <i>tmnAIII</i> | type I polyketide synthase                    | 3408        | 98.9         |
| <i>tmnAIV</i>  | type I polyketide synthase                    | 5657        | 97.3         |
| <i>tmnAV</i>   | type I polyketide synthase                    | 5963        | 97.9         |
| <i>tmnC</i>    | FAD-dependent epoxidase                       | 473         | 99.3         |
| <i>tmn14a</i>  | ferredoxin                                    | 80          | 97.5         |
| <i>tmn14</i>   | cytochrome P450                               | 400         | 100          |
| <i>tmn15</i>   | 3-oxoacyl-(acyl-carrier-protein) synthase III | 346         | 99.4         |
| <i>tmn16</i>   | HAD-IIIC family phosphatase                   | 633         | 99.5         |
| <i>tmn17</i>   | a/b hydrolase                                 | 345         | 99.7         |
| <i>tmn-2</i>   | no hit                                        | 109         | -            |

|               |                                       |      |      |
|---------------|---------------------------------------|------|------|
| <i>tmn18</i>  | SARP family transcriptional regulator | 256  | 99.6 |
| <i>tmnDII</i> | type I polyketide synthase            | 1508 | 99.5 |
| <i>tmnDI</i>  | type I polyketide synthase            | 2488 | 98.9 |
| <i>tmn20</i>  | acyltransferase                       | 584  | 100  |
| <i>tmn21</i>  | TetR family transcriptional regulator | 232  | 100  |
| <i>tmn22</i>  | membrane protein                      | 367  | 98.1 |
| <i>tmn23</i>  | phosphopantetheinyl transferase       | 530  | 99.6 |
| <i>tmn24</i>  | ATP-grasp domain-containing protein   | 415  | 98.8 |
| <i>tmn25</i>  | hypothetical protein                  | 663  | 98.8 |
| <i>tmn26</i>  | hypothetical protein                  | 235  | 99.1 |

\*Because an amino acid sequence of Tmn3 deposited in MiBiG was shortened, alignment was conducted using a short Tmn3 sequence.

\*\*Because *tmn-1* shows no similarity to known genes in *tmn* cluster of *Streptomyces* sp. NRRL 11266, similarity to WP\_220189144.1 derived from *Streptomyces* sp. PIP175 was shown in this table.

**Figure S19.** Determination of Ca<sup>2+</sup> ionophobic activity of **1** and **4**.

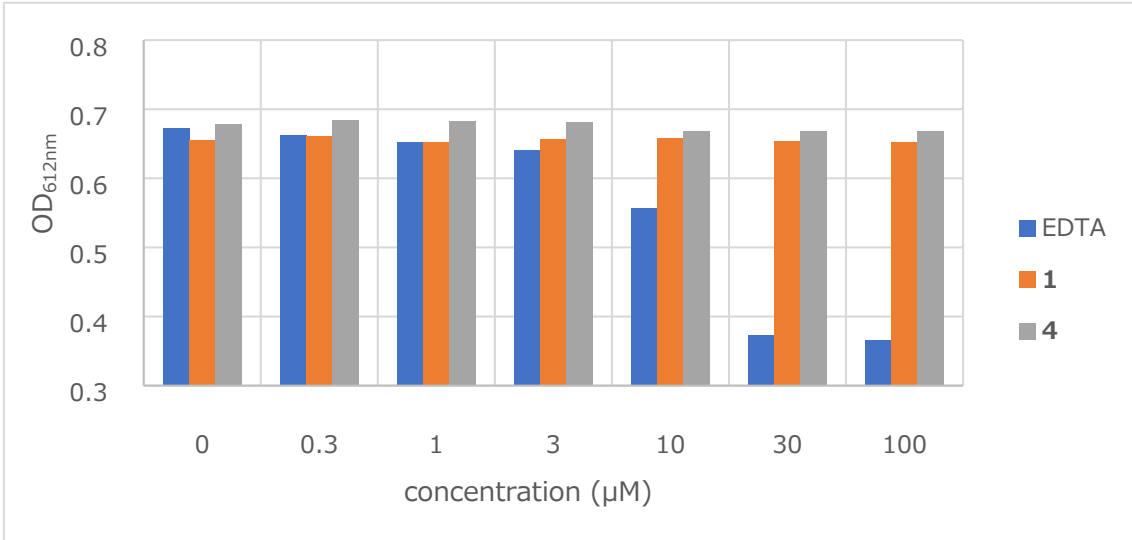



Table S2. Results of activity evaluation of tetrnomycin and its derivatives using 6 mm paper-discs (stopping circle diameter: mm)

| Test strain: MRSA (ATCC43300)          |       |       |       |       |       |       |         |         |
|----------------------------------------|-------|-------|-------|-------|-------|-------|---------|---------|
| Medium: Mueller hinton agar            |       |       |       |       |       |       |         |         |
| Compound ( $\mu\text{g}/\text{disc}$ ) | 3     | 1     | 0.3   | 0.1   | 0.03  | 0.01  | 0.003   | 0.001   |
| Compound <b>3</b>                      | N.T.  | 11.86 | 10.38 | 8.43  | 7.57  | 7.25  | ∅       | ∅       |
| Tetronomycin                           | N.T.  | 26.72 | 23.73 | 19.47 | 12.09 | 7.62  | unclear | ∅       |
| VCM                                    | 12.00 |       |       |       |       |       |         |         |
| Compound <b>4</b>                      | 18.77 | 15.98 | 10.23 | ∅     | ∅     | ∅     | ∅       | ∅       |
| Tetronomycin                           | 25.91 | 24.78 | 21.65 | 19.93 | 15.47 | 12.73 | 6.78    | ∅       |
| VCM                                    | 10.23 |       |       |       |       |       |         |         |
| Compound <b>5</b>                      | 21.93 | 20.95 | 18.16 | 15.39 | 12.21 | 8.69  | ∅       | ∅       |
| Tetronomycin                           | 27.18 | 25.78 | 22.15 | 20.60 | 14.98 | 12.32 | 10.42   | unclear |
| VCM                                    | 10.63 |       |       |       |       |       |         |         |
| Compound <b>6</b>                      | N.T.  | 19.09 | 15.14 | 10.15 | 7.22  | ∅     | ∅       | ∅       |
| Tetronomycin                           | N.T.  | 26.16 | 22.91 | 18.58 | 15.03 | 11.35 | 8.11    | ∅       |
| VCM                                    | 10.55 |       |       |       |       |       |         |         |
| Compound <b>7</b>                      | 25.03 | 20.06 | 17.38 | 11.27 | 9.97  | 7.83  | ∅       | ∅       |
| Tetronomycin                           | 25.30 | 23.26 | 20.45 | 17.68 | 15.11 | 12.32 | 11.86   | ∅       |
| VCM                                    | 10.47 |       |       |       |       |       |         |         |

VCM: Vancomycin

N.T. : not tested      ∅ : No inhibition

Table S3. Information of strains used in this study.

| No | Strains                                  | Source                             | Characteristic             | Reference No. |
|----|------------------------------------------|------------------------------------|----------------------------|---------------|
| 1  | <i>Staphylococcus aureus</i>             | ATCC 6538P                         | MSSA                       |               |
| 2  | <i>Staphylococcus aureus</i>             | ATCC 19636                         | MSSA                       |               |
| 3  | <i>Staphylococcus aureus</i> ISP217      | Clinical isolate, laboratory stock | MSSA, macrolide resistant  | 1             |
| 4  | <i>Staphylococcus aureus</i> KUB854      | Clinical isolate, laboratory stock | MRSA (N315-derived strain) |               |
| 5  | <i>Staphylococcus aureus</i> KUB855      | Clinical isolate, laboratory stock | MRSA                       |               |
| 6  | <i>Staphylococcus aureus</i> KUB856      | Clinical isolate, laboratory stock | MRSA                       |               |
| 7  | <i>Staphylococcus aureus</i>             | ATCC700699                         | VISA                       |               |
| 8  | <i>Staphylococcus aureus</i> KUB877      | Clinical isolate, laboratory stock | LZD resistant              | 2             |
| 9  | <i>Staphylococcus epidermidis</i> KUB795 | Clinical isolate, laboratory stock |                            | 3             |
| 10 | <i>Kocuria rhizophila</i>                | ATCC9341                           |                            |               |
| 11 | <i>Enterococcus faecalis</i>             | ATCC29212                          | Vancomycin-susceptible     |               |
| 12 | <i>Enterococcus faecalis</i>             | NCTC12201                          | VRE, vanA                  | 4             |
| 13 | <i>Enterococcus faecalis</i> KUB7012     | Clinical isolate, laboratory stock | VRE, vanB                  |               |
| 14 | <i>Enterococcus faecium</i>              | NCTC12204                          | VRE, vanA                  |               |
| 15 | <i>Enterococcus faecium</i> KUB7013      | Clinical isolate, laboratory stock | VRE, vanB                  |               |
| 16 | <i>Enterococcus gallinarum</i> KUB 7014  | Clinical isolate, laboratory stock | VRE, vanC                  |               |
| 17 | <i>Escherichia coli</i>                  | NIHJ JC-2                          |                            |               |
| 18 | <i>Citrobacter freundii</i>              | ATCC8090                           |                            |               |
| 19 | <i>Klebsiella pneumoniae</i>             | NCTC9632                           |                            |               |
| 20 | <i>Proteus vulgaris</i>                  | ATCC8427                           |                            |               |
| 21 | <i>Morganella morganii</i>               | IID 602                            |                            |               |
| 22 | <i>Serratia marcescens</i>               | IFO12648                           |                            |               |
| 23 | <i>Enterobacter cloacae</i>              | IFO13535                           |                            |               |
| 24 | <i>Klebsiella aerogenes</i>              | NCTC10006                          |                            |               |
| 25 | <i>Pseudomonas aeruginosa</i> 46001      | Clinical isolate, laboratory stock |                            | 4             |
| 26 | <i>Pseudomonas aeruginosa</i> E-2        | Clinical isolate, laboratory stock |                            | 5             |
| 27 | <i>Acinetobacter calcoaceticus</i>       | IFO12552                           |                            |               |

The laboratory stock strains of KUB854, 855, 856, 877, 7012, 7013, and 7014 were clinically isolated at the hospitals in Japan.

## References

1. Matsuoka M, et al. Localization of a determinant mediating partial macrolide resistance in *Staphylococcus aureus*. *Microbiol. Immunol.* 1990, **34**, 643-652.
2. Ikeda-Dantsuji Y et al. Linezolid-resistant *Staphylococcus aureus* isolated from 2006 through 2008 at six hospitals in Japan. *J. Infect. Chemother.* 2011, **17**, 45-51.
3. Matsui H, et al. Immunochromatographic detection of the group B streptococcus antigen from enrichment cultures. *Clin. Vaccine Immunol.* 2013, **20**, 1381-1387.
4. Yamazaki H, et al. Novel cephalosporins 1. Synthesis of 3-benzothioapyranlythiovinyl cephalosporins and antibacterial activity against methicillin-resistant *Staphylococcus aureus* and vancomycin-resistant *Enterococcus faecalis*. *J. Antibiot.* 2000, **53**, 546-550.
5. Saito M, et al. Studies on the combination action of sisomicin, gentamicin and piperacillin, cefmetazole against *Pseudomonas aeruginosa* and *Serratia marcescens*. *Jpn. J. Antibiot.* 1983, **36**, 37-46.
